# Supplementary material
Source: PubMed Central journal article supplement (PMC3156383)
Supplement: NIHMS306000-supplement-01.pdf [file NIHMS306000-supplement-01.pdf]

## Supplementary Fig. 1

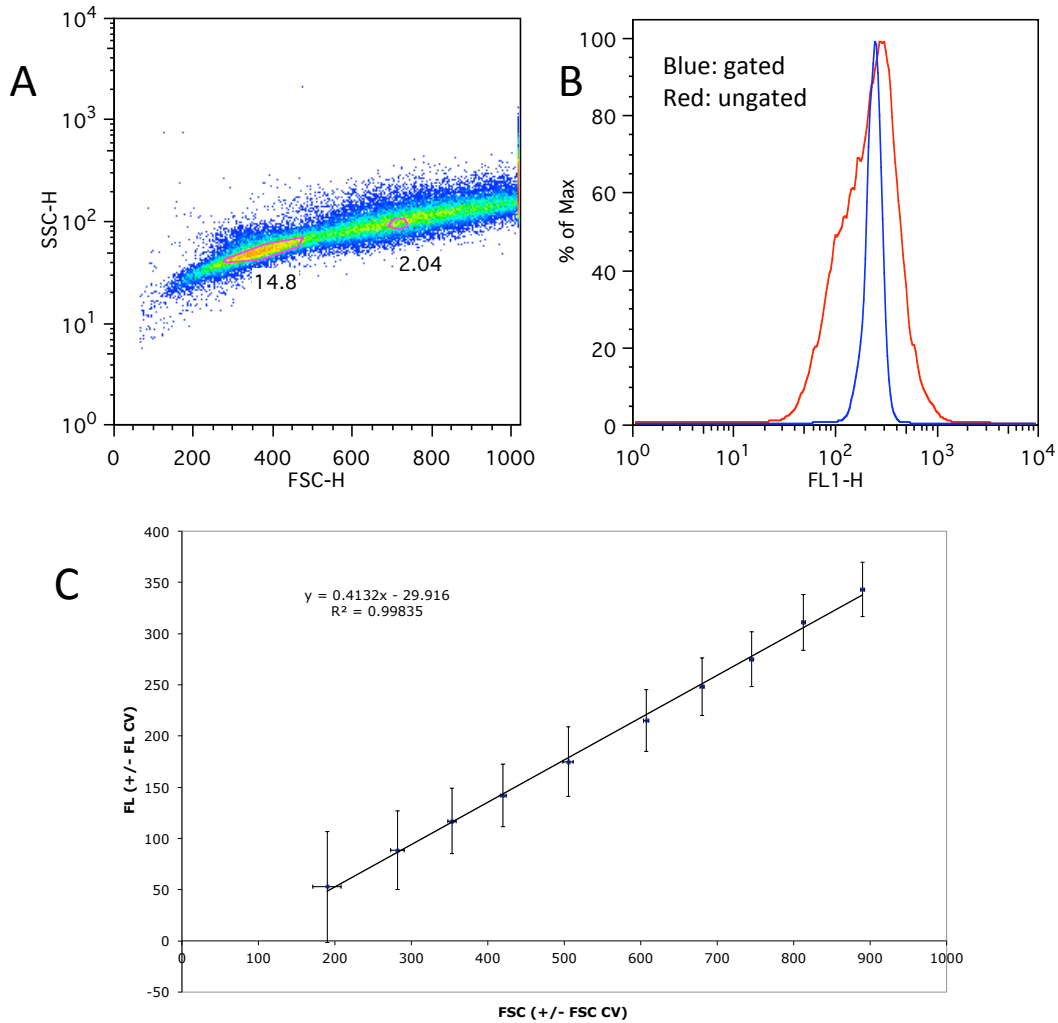

Supplementary Figure 1. Yeast are highly variable in size and much of the observed variance in fluorescence comes from differing cell volumes. a) Example flow cytometry data for yeast in exponential phase. Forward scatter (FSC) is an approximate measure of cell size and side scatter (SSC) is an approximate measure of granularity. b) A small gate on FSC vs. SSC reduces the observed variance in fluorescence. c) Fluorescence correlates strongly with size, but does not account for the total observed variance.
